# Supplementary material
Source: MDPI journal article supplement (https://www.mdpi.com/1424-8247/15/2/205)
Supplement: s1 [file s1]

Article

# Magnolol and luteolin inhibition of $\alpha$ -glucosidase activity: kinetics and type of interaction detected by in vitro and in silico studies

Francine Medjiofack Djeu<sup>1</sup>, Eugenio Ragazzi<sup>1</sup>, Miriana Urettini<sup>1</sup>, Beatrice Sauro<sup>1</sup>, Elena Cichero<sup>2\*</sup>, Michele Tonelli<sup>2</sup> and Guglielmina Frolidi<sup>1\*</sup>

<sup>1</sup> Department of Pharmaceutical and Pharmacological Sciences, University of Padova, Padova, Italy; [francine.medjiofackdjeu@phd.unipd.it](mailto:francine.medjiofackdjeu@phd.unipd.it) (FMD), [eugenio.ragazzi@unipd.it](mailto:eugenio.ragazzi@unipd.it) (ER)

<sup>2</sup> Department of Pharmacy, University of Genova, Genova, Italy; [tonelli@difar.unige.it](mailto:tonelli@difar.unige.it) (MT)

\* Correspondence: [g.frolidi@unipd.it](mailto:g.frolidi@unipd.it); Tel.: +39-049-827-5092; Fax: +39-049-827-5093 (GF); [cichero@difar.unige.it](mailto:cichero@difar.unige.it) (EC)

## Supplementary materials

**Citation:** Djeu, F.M.; Ragazzi, E.; Urettini, M.; Sauro, B.; Cichero, E.; Tonelli, M.; Frolidi, G. Magnolol and Luteolin Inhibition of  $\alpha$ -Glucosidase Activity: Kinetics and Type of Interaction Detected by In Vitro and In Silico Studies. *Pharmaceuticals* **2022**, *15*, 205. <https://doi.org/10.3390/ph15020205>

Academic Editors: Víctor López and Filippo Maggi

Received: 28 December 2021

Accepted: 4 February 2022

Published: 8 February 2022

**Publisher's Note:** MDPI stays neutral with regard to jurisdictional claims in published maps and institutional affiliations.

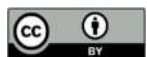

**Copyright:** © 2022 by the authors. Licensee MDPI, Basel, Switzerland. This article is an open access article distributed under the terms and conditions of the Creative Commons Attribution (CC BY) license (<https://creativecommons.org/licenses/by/4.0/>).

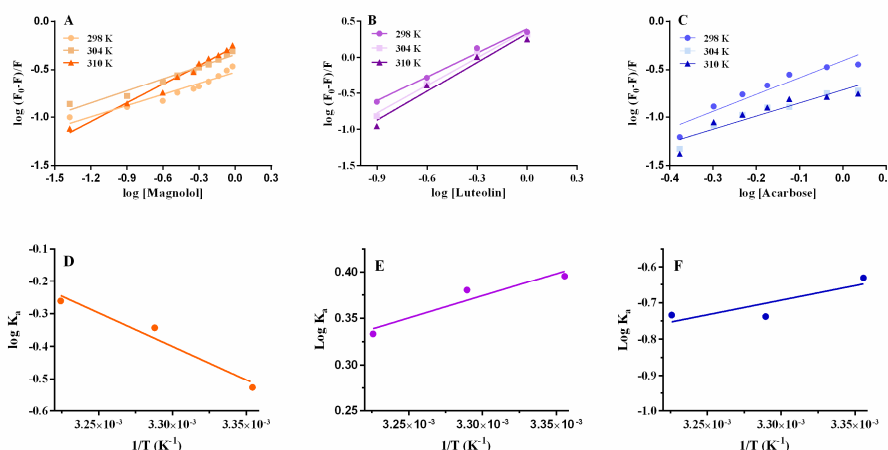

**Figure S1** Quenching effect of magnolol (A), luteolin (B) and acarbose (C) on 0.35 μM  $\alpha$ -glucosidase fluorescence at three different temperatures (298, 304 and 310 K). Van't Hoff plots for the interaction between  $\alpha$ -glucosidase and magnolol (D), luteolin (E) and acarbose (F).

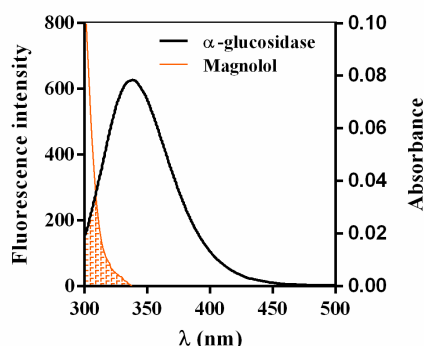

**Figure S2** Spectral overlaps of the fluorescence spectrum of  $\alpha$ -glucosidase with the UV absorption spectrum of magnolol. Spectra were collected in the wavelength range of 300–500 nm, at room temperature (pH 6.8) and at a concentration of 0.35 μM.

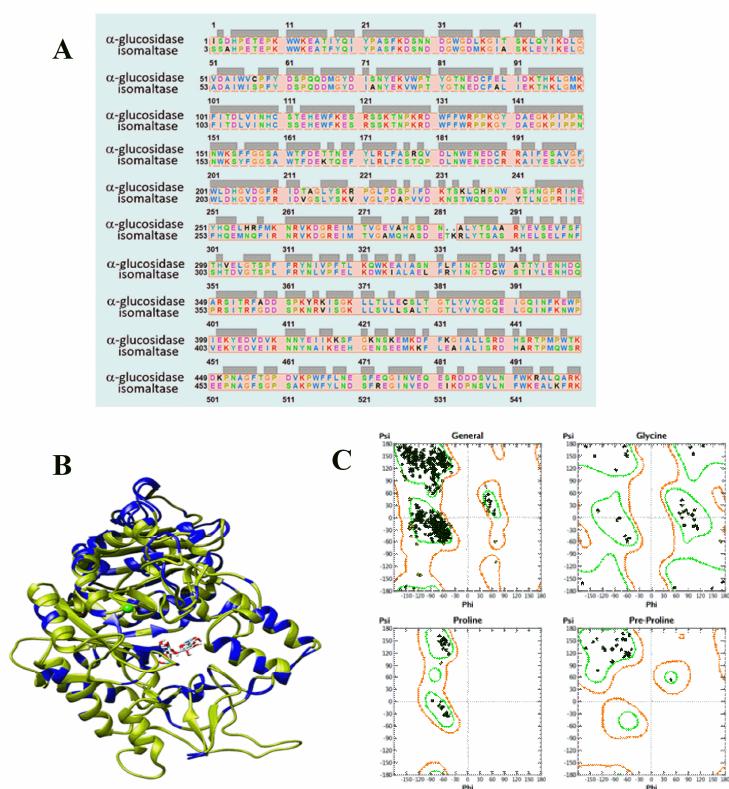

**Figure S3** Alignment of the target protein  $\alpha$ -glucosidase with respect to template isomaltase. The conserved regions are highlighted by gray stripes (**A**). Superimposition of the modeled  $\alpha$ -glucosidase with the X-ray data of the isomaltase. The conserved regions are shown in green. The positioning of isomaltase within the two aforementioned enzymes is shown in cyan and white (**B**). The Ramachandran plot describes the stereochemical quality of the modeled protein. The plot combines four separate Ramachandran maps to distinguish the membership to a particular class (general, proline, glycine, and pre-proline). The colour scheme encodes the affiliation to a certain region within the respective Ramachandran map. Residues in the core region are rendered green or yellow if they are found to be in the allowed region and red if they are in the outlier region. Outliers are always marked as crosses, independent of their class (**C**).

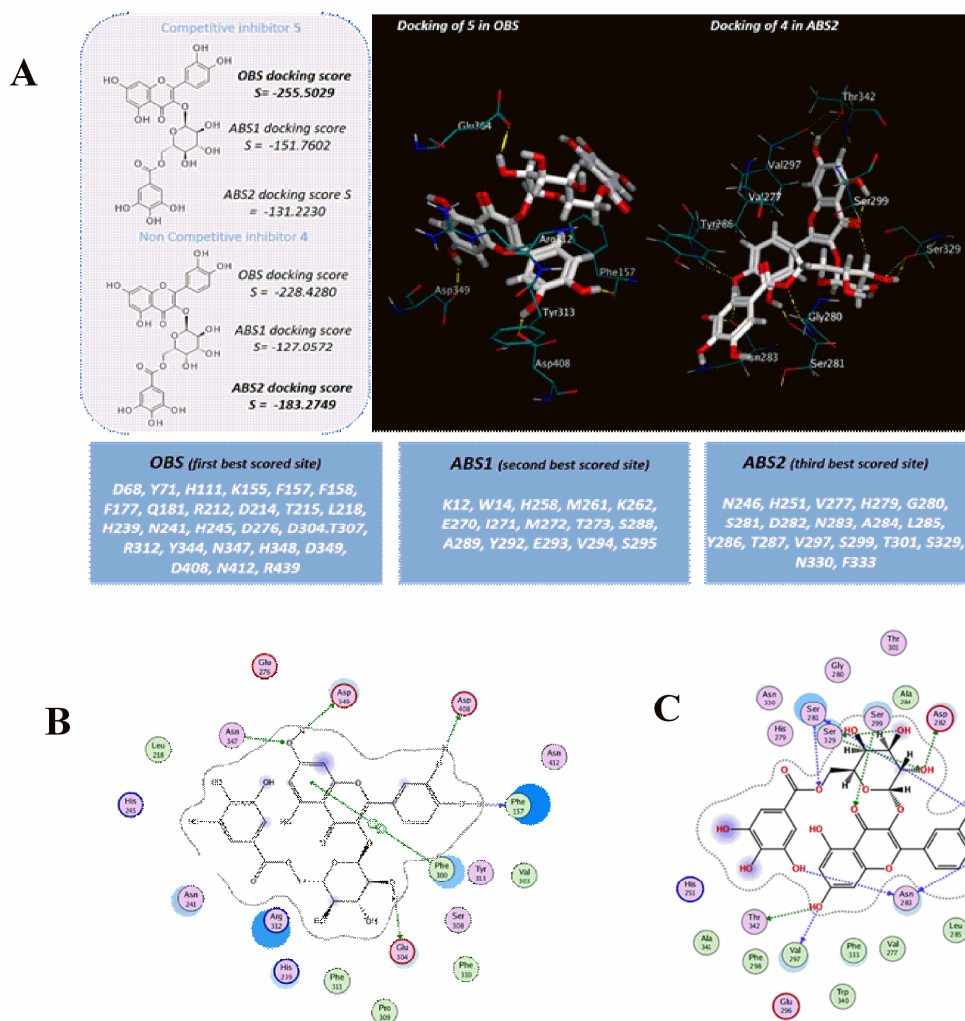

**Figure S4** Docking position of  $\alpha$ -glucosidase inhibitors **5** and **4** at the OBS and ABS2 binding sites (**A**). Only the most relevant residues are depicted. The amino acids included in OBS, ABS1, and ABS2 are listed. Ligplot **B** reports the most relevant contacts between  $\alpha$ -glucosidase and the competitive inhibitor **5**. Hydrophobic and polar residues are shown in green and pink, respectively, with negative and positive charged amino acids detailed by red and blue circles (**B**). Ligplot **C** reports the most relevant contacts between  $\alpha$ -glucosidase and the non-competitive inhibitor **4**. Hydrophobic and polar residues are shown in green and pink, respectively, being the negative and positive-charged amino acids detailed by red and blue circles (**C**).

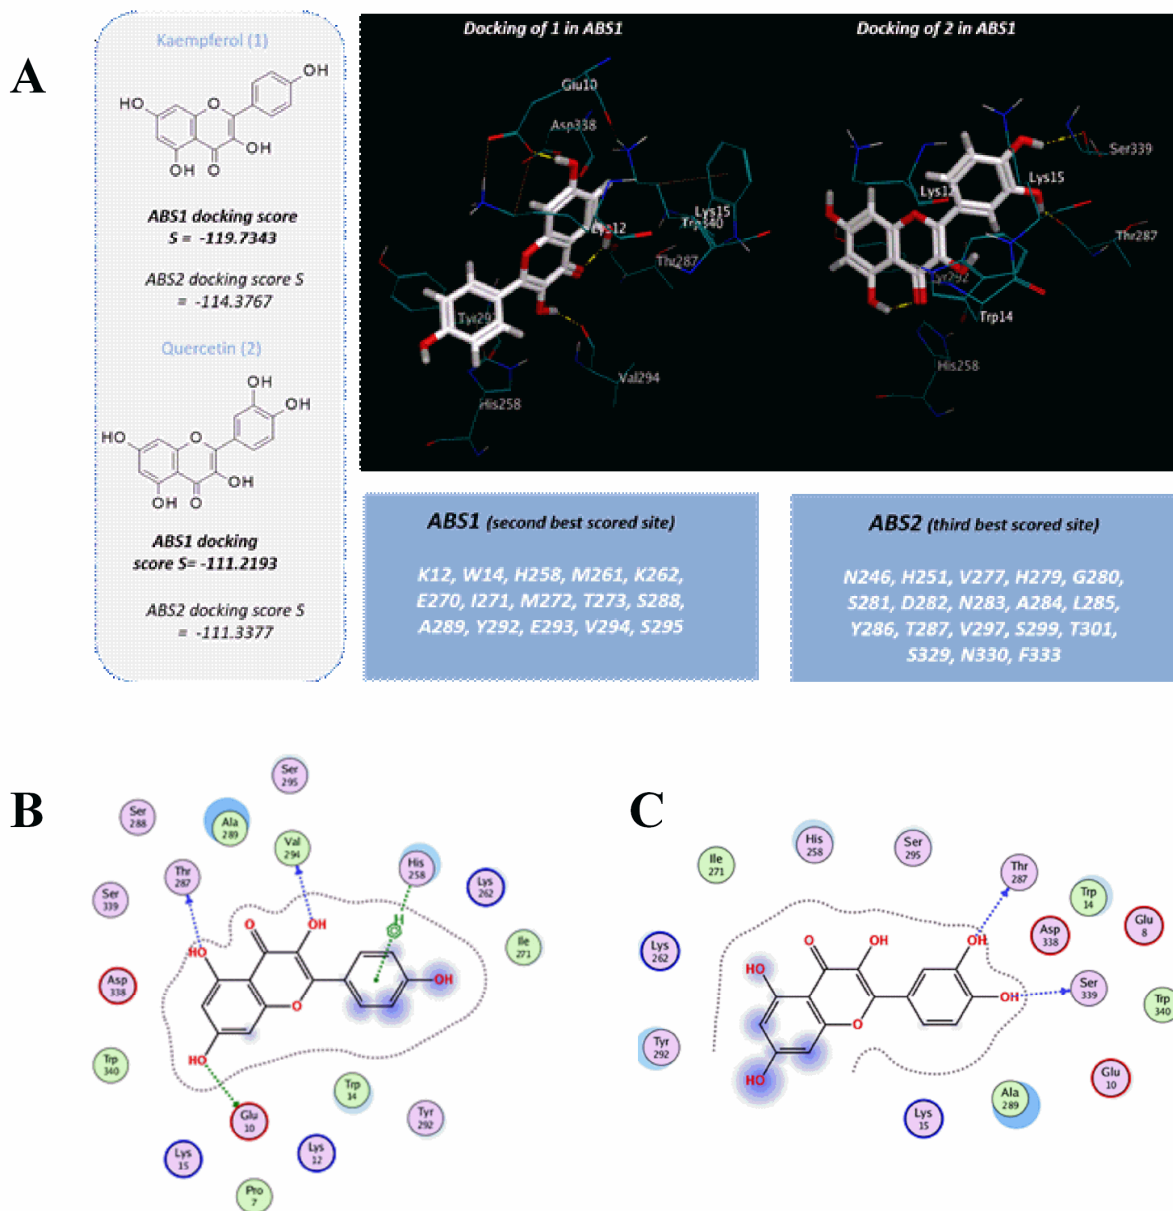

**Figure S5** Docking positioning of  $\alpha$ -glucosidase inhibitors **1** and **2** at the ABS1 binding site (**A**). Only the most relevant residues are depicted. The amino acids included in ABS1 and ABS2 are listed. Ligplot B reports the most relevant contacts between  $\alpha$ -glucosidase and the non-competitive inhibitor **1** in ABS1. Hydrophobic and polar residues are shown in green and pink, respectively, being the negative and positive-charged amino acids detailed by red and blue circles (**B**). Ligplot C reports the most relevant contacts between  $\alpha$ -glucosidase and the non-competitive inhibitor **2** in ABS1. Hydrophobic and polar residues are shown in green and pink, respectively, being the negative and positive-charged amino acids detailed by red and blue circles (**C**).

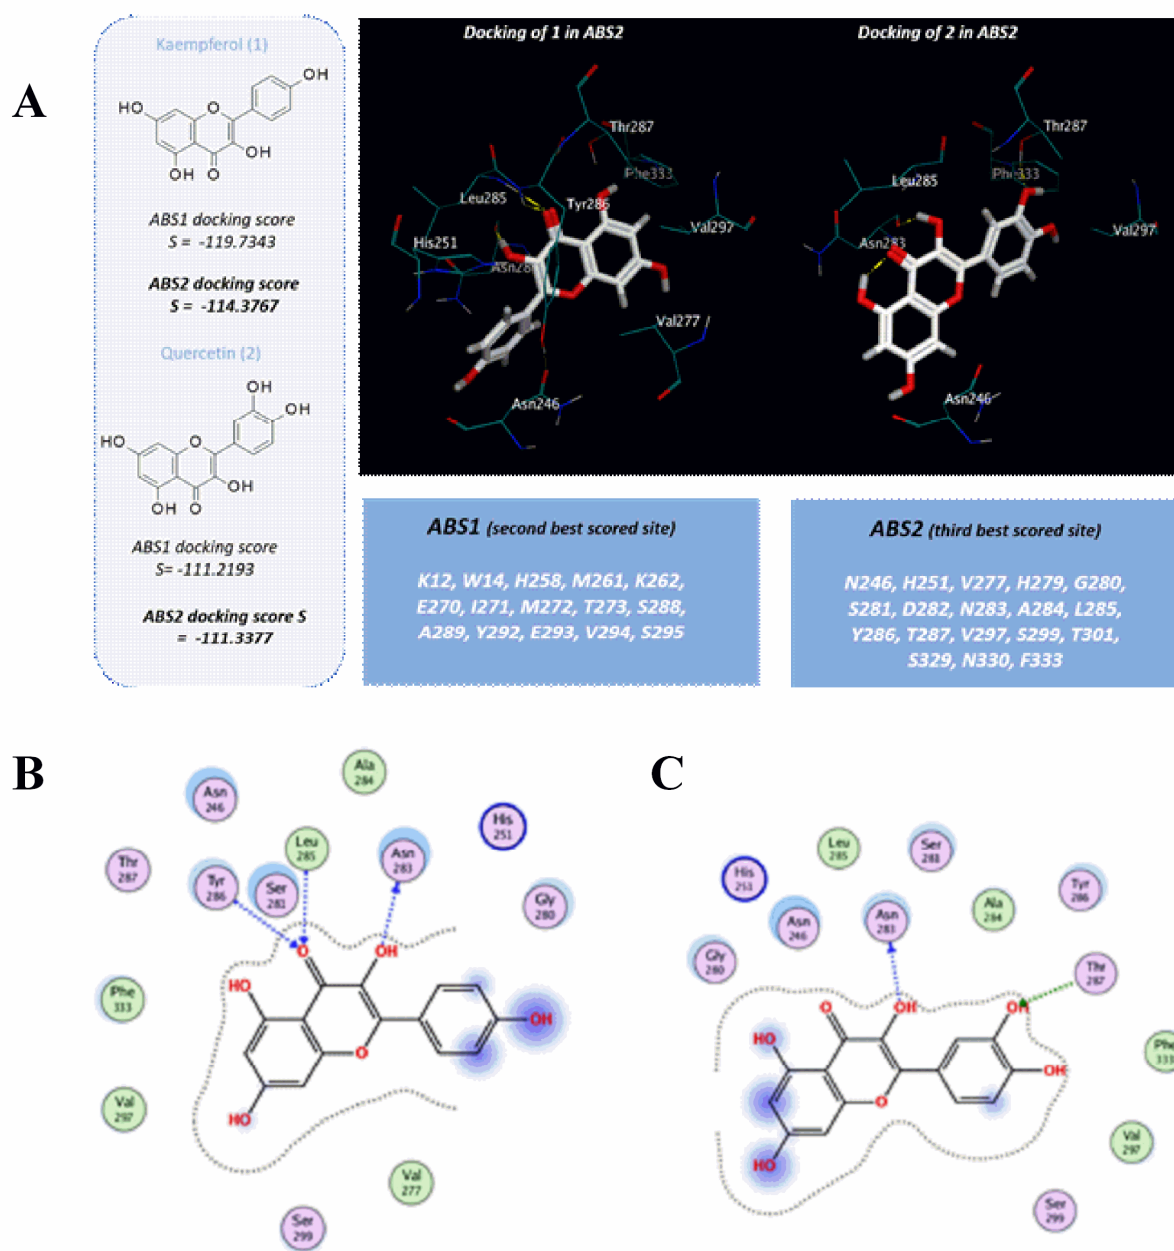

**Figure S6.** Docking positioning of  $\alpha$ -glucosidase inhibitors **1** and **2** at the ABS2 binding site (**A**). Only the most relevant residues are depicted. The amino acids included in ABS1 and ABS2 are listed. Ligplot B reports the most relevant contacts between  $\alpha$ -glucosidase and the non-competitive inhibitor **1** in ABS2. Hydrophobic and polar residues are shown in green and pink, respectively, being the negative and positive-charged amino acids detailed by red and blue circles (**B**). Ligplot C reports the most relevant contacts between  $\alpha$ -glucosidase and the non-competitive inhibitor **2** in ABS2. Hydrophobic and polar residues are shown in green and pink, respectively, being the negative and positive-charged amino acids detailed by red and blue circles (**C**).

**Table S1**  $K_m$  and  $V_{max}$  values of  $\alpha$ -glucosidase with different concentrations of magnolol.

| Magnolol ( $\mu$ M) | $K_m$ (mM)        | $V_{max}$ ( $\Delta$ OD/min) | $V_{max}$ ( $\mu$ M/min)* |
|---------------------|-------------------|------------------------------|---------------------------|
| --                  | $0.374 \pm 0.043$ | $0.155 \pm 0.005$            | $15.5 \pm 0.50$           |
| 10                  | $0.530 \pm 0.079$ | $0.162 \pm 0.008$            | $16.2 \pm 0.80$           |
| 25                  | $0.594 \pm 0.080$ | $0.148 \pm 0.007$            | $14.8 \pm 0.70$           |
| 50                  | $0.538 \pm 0.082$ | $0.129 \pm 0.006$            | $12.9 \pm 0.60$           |
| 100                 | $0.575 \pm 0.238$ | $0.100 \pm 0.013$            | $10.0 \pm 1.30$           |

\* The data were converted using the Lambert–Beer relationship.

**Table S2**  $K_m$  and  $V_{max}$  of  $\alpha$ -glucosidase with different concentrations of luteolin.

| Luteolin ( $\mu$ M) | $K_m$ (mM)        | $V_{max}$ ( $\Delta$ OD/min) | $V_{max}$ ( $\mu$ M/min)* |
|---------------------|-------------------|------------------------------|---------------------------|
| --                  | $0.321 \pm 0.042$ | $0.159 \pm 0.006$            | $15.90 \pm 0.60$          |
| 5                   | $0.353 \pm 0.047$ | $0.133 \pm 0.006$            | $13.30 \pm 0.60$          |
| 10                  | $0.371 \pm 0.055$ | $0.119 \pm 0.005$            | $11.90 \pm 0.50$          |
| 25                  | $0.357 \pm 0.068$ | $0.091 \pm 0.005$            | $9.10 \pm 0.50$           |
| 40                  | $0.356 \pm 0.075$ | $0.080 \pm 0.005$            | $8.00 \pm 0.50$           |
| 50                  | $0.370 \pm 0.095$ | $0.063 \pm 0.006$            | $6.34 \pm 0.60$           |

\* The data were converted using the Lambert–Beer relationship.

**Table S3**  $K_m$  and  $V_{max}$  of  $\alpha$ -glucosidase with different concentrations of acarbose.

| Acarbose ( $\mu$ M) | $K_m$ (mM)        | $V_{max}$ ( $\Delta$ OD/min) | $V_{max}$ ( $\mu$ M/min)* |
|---------------------|-------------------|------------------------------|---------------------------|
| --                  | $0.296 \pm 0.080$ | $0.132 \pm 0.010$            | $13.2 \pm 1.00$           |
| 200                 | $0.908 \pm 0.228$ | $0.127 \pm 0.015$            | $12.7 \pm 1.50$           |
| 400                 | $1.311 \pm 0.341$ | $0.129 \pm 0.017$            | $12.9 \pm 1.70$           |
| 800                 | $1.960 \pm 0.519$ | $0.124 \pm 0.020$            | $12.4 \pm 2.00$           |
| 1600                | $3.240 \pm 0.638$ | $0.120 \pm 0.016$            | $12.0 \pm 1.60$           |
| 3200                | $5.912 \pm 1.809$ | $0.125 \pm 0.030$            | $12.5 \pm 3.00$           |
| 4000                | $8.295 \pm 3.316$ | $0.141 \pm 0.047$            | $14.1 \pm 4.70$           |

\* The data were converted using the Lambert–Beer relationship.
